# Supplementary material for: Performance of sodium-ion supercapattery using LaMnO3 and rGO in non-aqueous electrolyte
Source: Royal Society of Chemistry journal article supplement (doi:10.1039/d2nj01898e), 2022-01-01
Supplement: d2nj01898e1.pdf [file d2nj01898e1.pdf]

## Performances of Sodium-ion Supercapattery using $\text{LaMnO}_3$ and rGO in non-Aqueous Electrolyte

*Vaithiyathan Sankar Devi, Kalidoss Kannadasan, Pamangadan C Sharafudeen and Perumal Elumalai\**

Electrochemical Energy Storage Lab, Department of Green Energy Technology,  
Madanjeet School of Green Energy Technologies, Pondicherry University,  
Puducherry – 605014, India

### Supplementary data

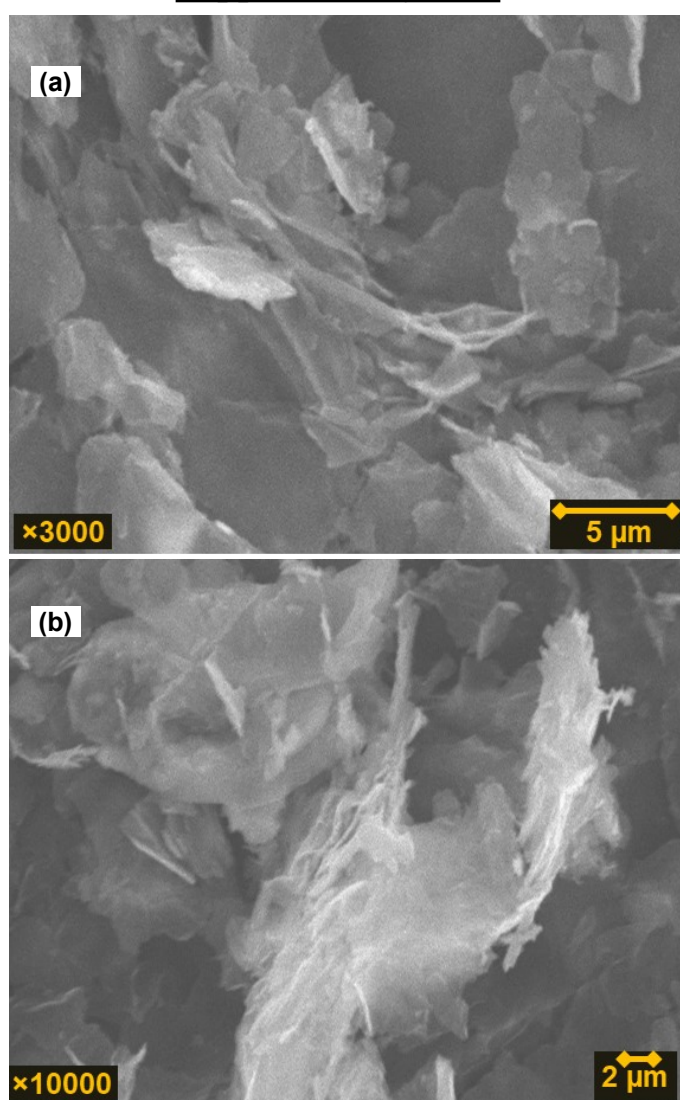

**Fig. S1 (a, b)** SEM images recorded for the rGO sample at different magnifications. The characteristic folded rGO flakes are visible in the SEM images indicating better surface area which has reflected in high specific capacitance of the rGO electrode.

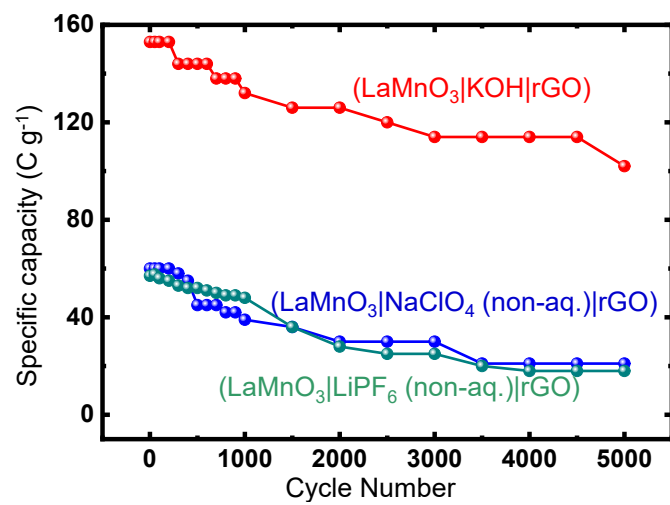

**Fig. S2** Specific capacity vs. cycle number for all the three devices including the aqueous (KOH) and non-aqueous (NaClO<sub>4</sub> and LiPF<sub>6</sub>) systems.

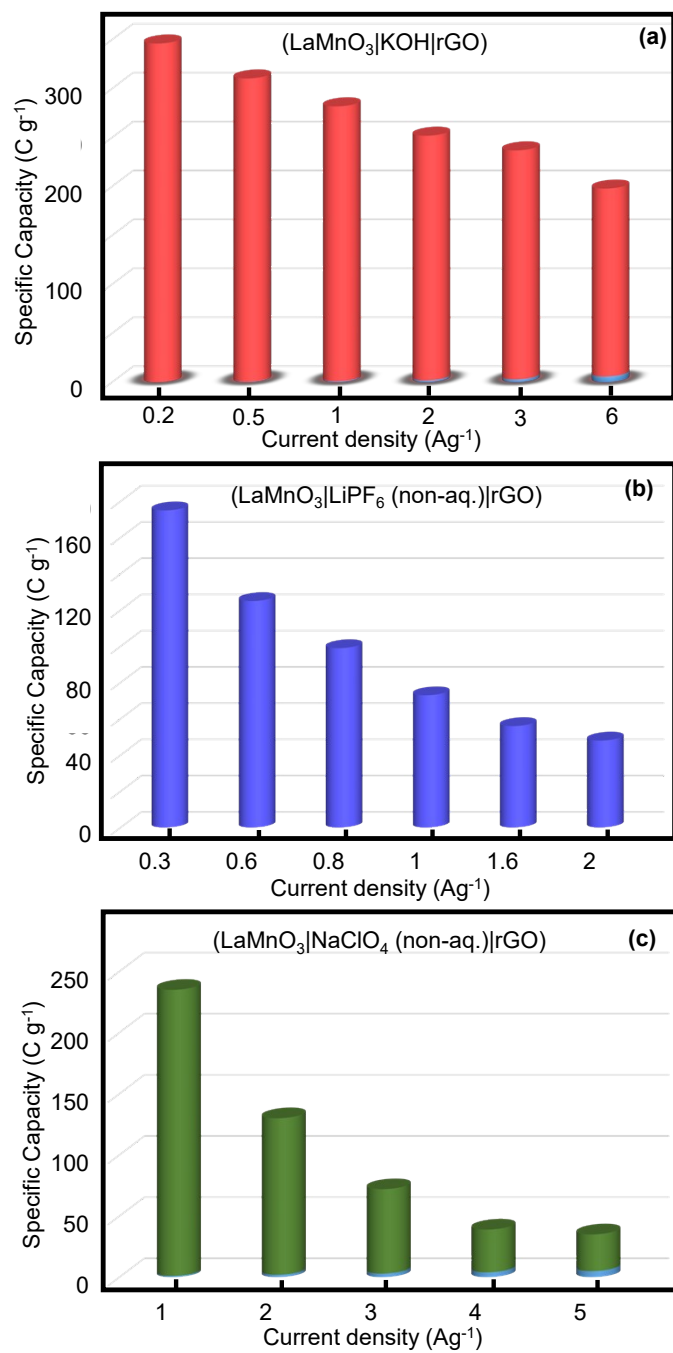

**Fig. S3.** Specific capacity vs. current density recorded for (a) aqueous supercapattery, (b) Lithium-ion supercapattery and (c) Sodium-ion supercapattery.

**Table. S1. Mass loadings of different materials and devices fabricated.**

| <b>System</b>                                 | <b>Aqueous three electrode study (mg/ cm<sup>2</sup>)</b> | <b>Aqueous two electrode device (mg)</b> | <b>Non-aqueous device – LIS (mg)</b> | <b>Non-aqueous device – SIS (mg)</b> |
|-----------------------------------------------|-----------------------------------------------------------|------------------------------------------|--------------------------------------|--------------------------------------|
| <b>Positive Electrode (LaMnO<sub>3</sub>)</b> | 5.29                                                      | 3.12                                     | 5.94                                 | 4.25                                 |
| <b>Negative Electrode (rGO)</b>               | 1.64                                                      | 3.53                                     | 6.87                                 | 3.81                                 |
